# Supplementary material
Source: Springer Nature journal article supplement (https://www.springermedizin.de/resource/supplementary/12888_2007_454_MOESM3_ESM.pdf/9483306)

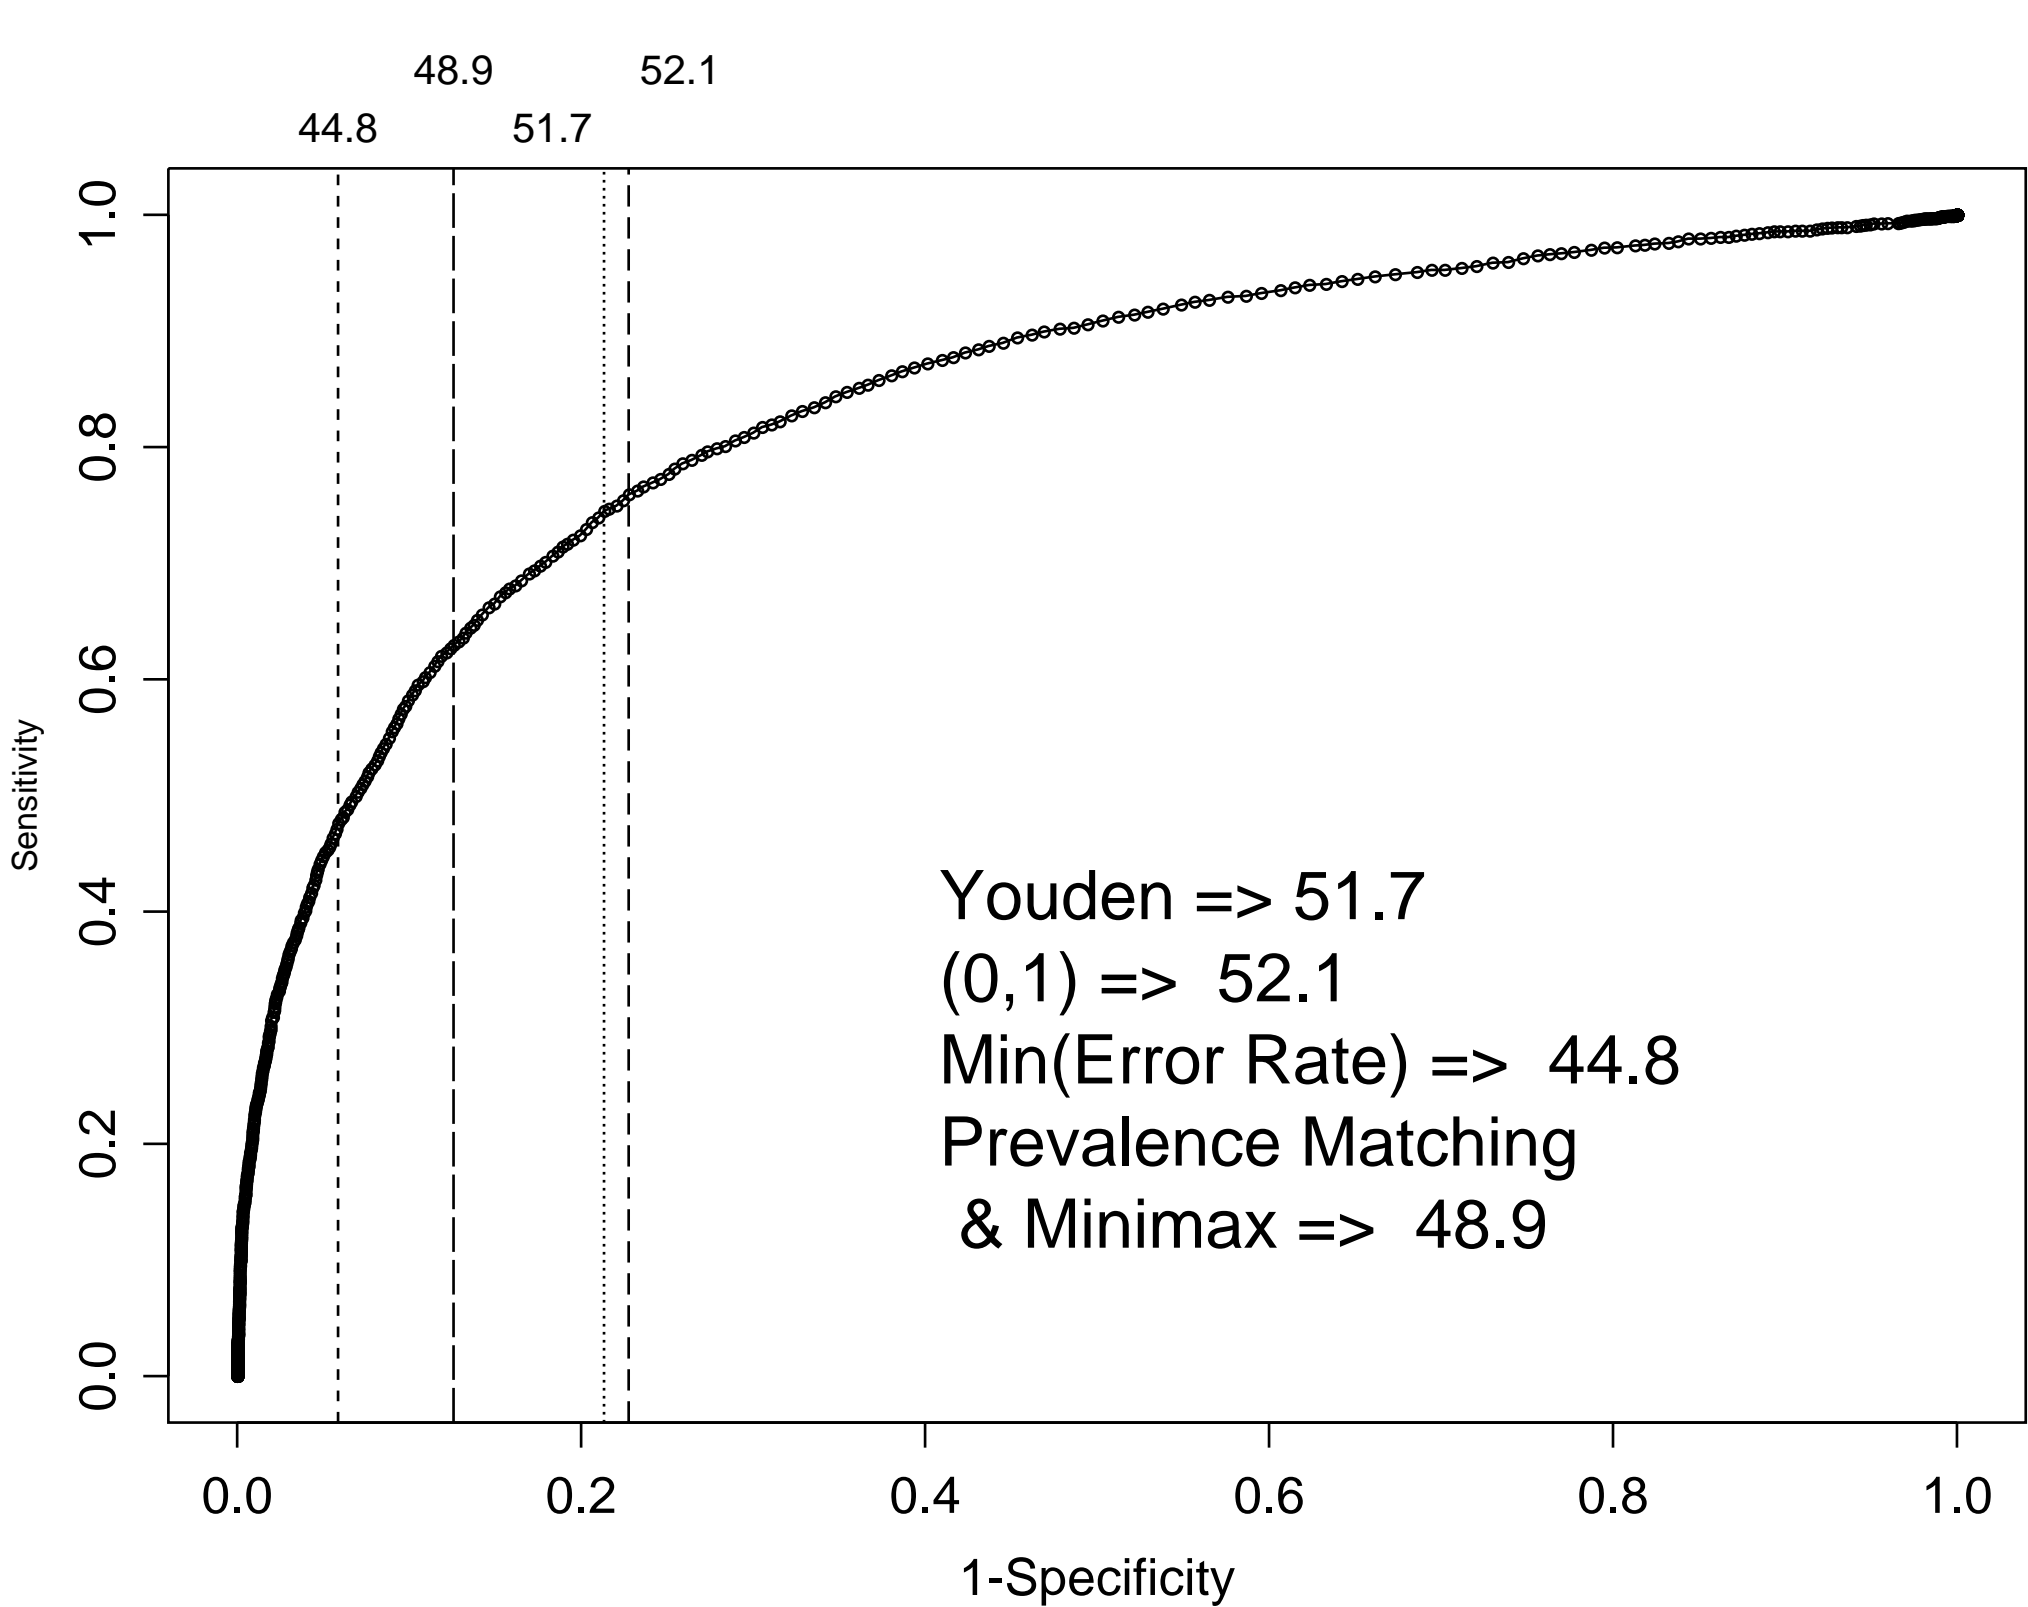

44.8      48.9      51.7      52.1

Youden => 51.7  
(0,1) => 52.1  
Min(Error Rate) => 44.8  
Prevalence Matching  
& Minimax => 48.9

Supplement: MOESM3 [file 9483306]
